# Supplementary material for: Multiplexed Detection of Human Papillomavirus Based on AzaBODIPY-Doped Silica-Coated Polystyrene Microparticles
Source: MDPI journal article supplement (doi:10.3390/chemosensors11010001), 2022-12-20
Supplement: s1 [file s1]

Archive with 1 entries (1 files):
- chemosensors-2035060-supplementary.pdf
